# Supplementary material for: An Analytical Target Profile for the Development of an In Vitro Release Test Method and Apparatus Selection in the Case of Semisolid Topical Formulations
Source: MDPI journal article supplement (doi:10.3390/pharmaceutics16030313), 2024-02-23
Supplement: s1 [file s1]

# Analytical target profile for *in vitro* release test method development and apparatus selection in the case of semisolid topical formulations

Réka Szoleczky <sup>1,2</sup>, Anita Kovács <sup>2</sup>, Szilvia Berkó <sup>2</sup> and Mária Budai-Szűcs <sup>2,\*</sup>

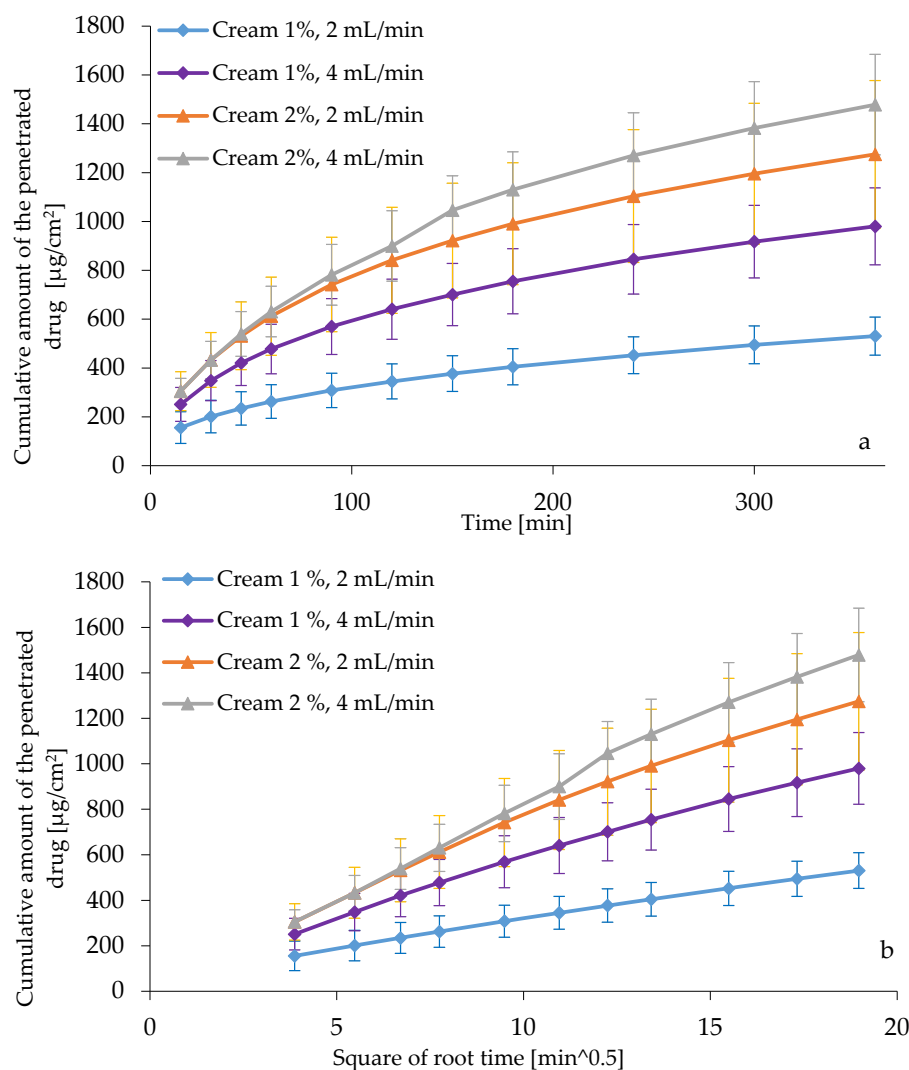

**Figure S1.** (a) Cumulative amount of diclofenac sodium penetrated through the MCE membrane plotted against time [min], (b) cumulative amount of diclofenac sodium penetrated through the MCE membrane plotted against square root of time [min<sup>0.5</sup>]. Instrument: Flow-through diffusion cell. Receptor medium: pH 7.4. Flow rate 2 and 4 mL/min. Product: Cream 1 % and 2 %. The data represent the mean ± standard error of the mean for five replicates.

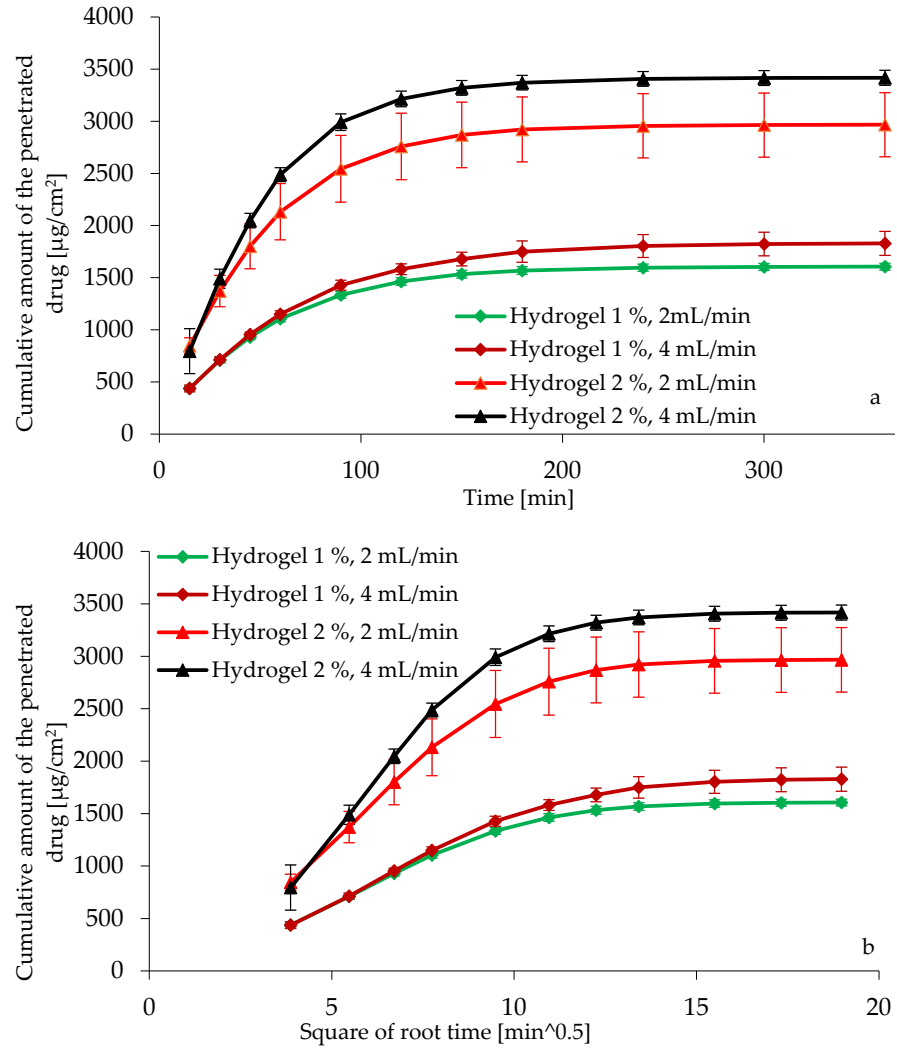

**Figure S2.** (a) Cumulative amount of diclofenac sodium penetrated through the MCE membrane plotted against time [min], (b) cumulative amount of diclofenac sodium penetrated through the MCE membrane plotted against square root of time [ $\text{min}^{0.5}$ ]. Instrument: Flow-through diffusion cell. Receptor medium: pH 7.4. Flow rate 2 and 4 mL/min. Product: Hydrogel 1 % and 2 %. The data represent the mean  $\pm$  standard error of the mean for five replicates.

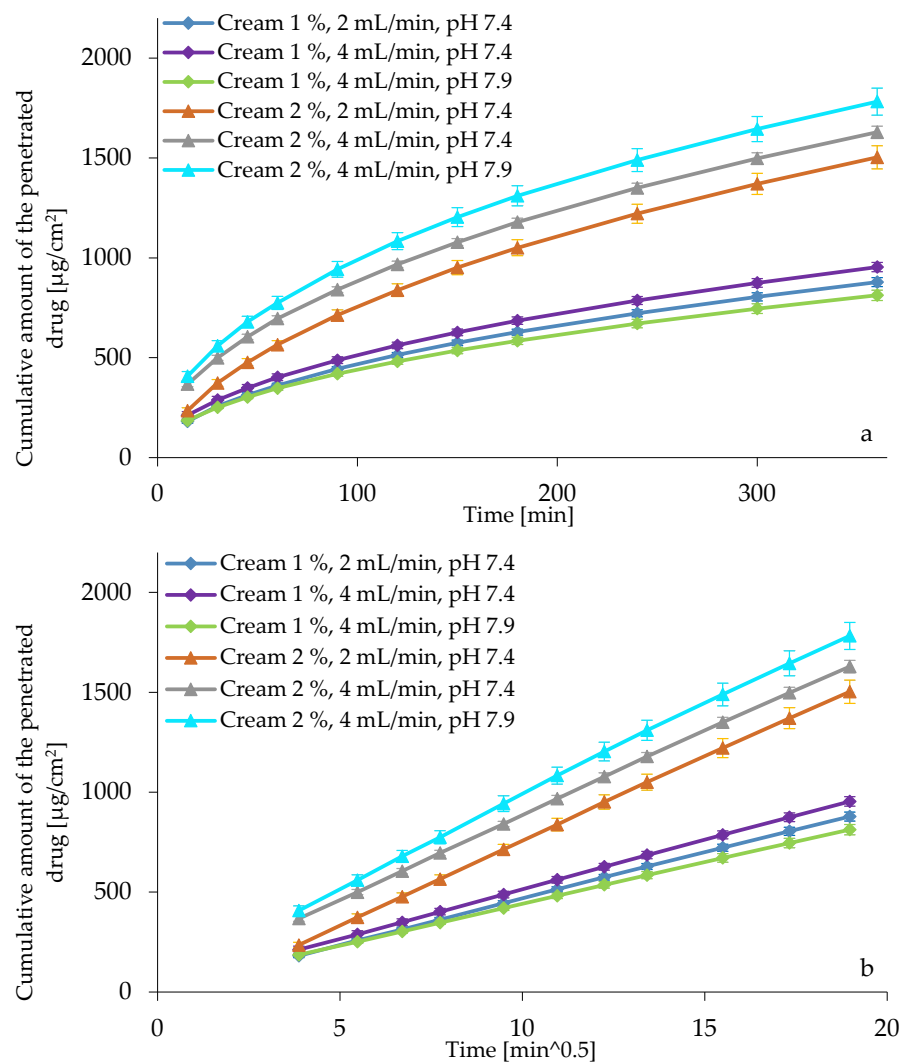

**Figure S3.** (a) Cumulative amount of diclofenac sodium penetrated through the MCE membrane plotted against time [min], (b) cumulative amount of diclofenac sodium penetrated through the MCE membrane plotted against square root of time [min<sup>0.5</sup>]. Instrument: USP Apparatus IV with semisolid adapter. Receptor media: pH 7.4 and 7.9. Flow rate 2 and 4 mL/min. Product: Cream 1 % and 2 %. The data represent the mean  $\pm$  standard error of the mean for six replicates.

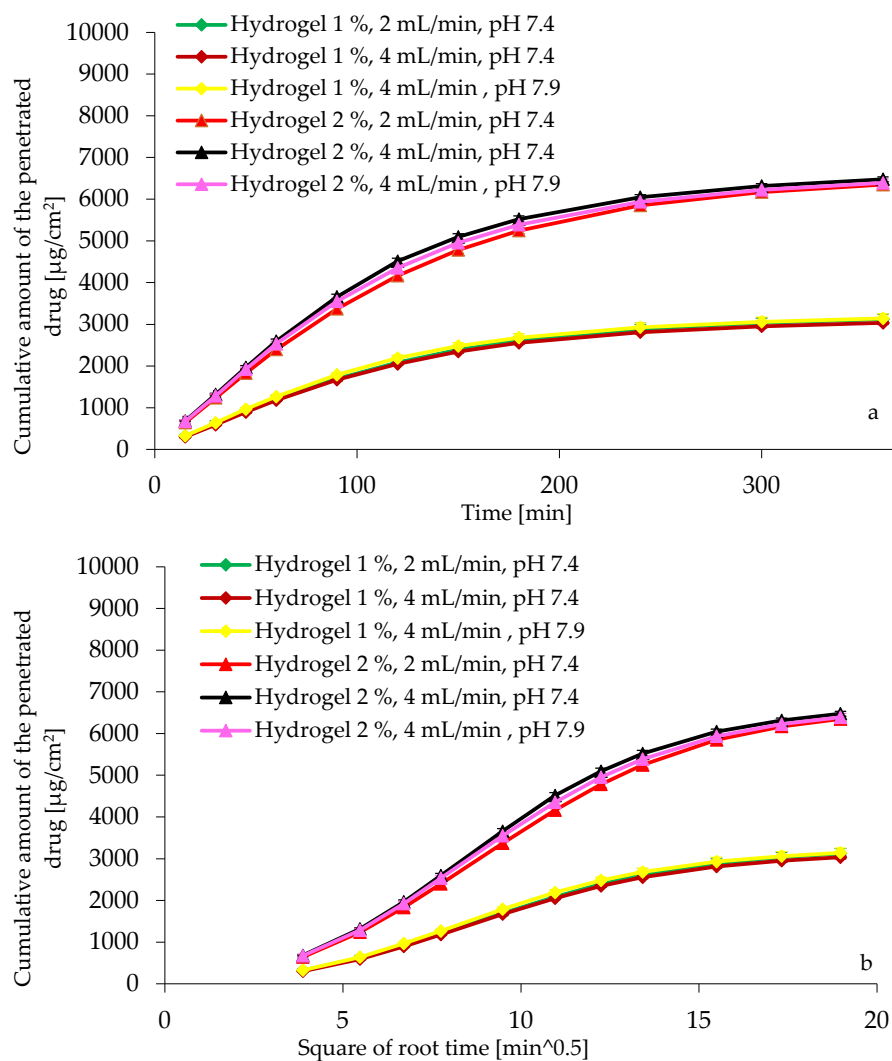

**Figure S4.** (a) Cumulative amount of diclofenac sodium penetrated through the MCE membrane plotted against time [min], (b) cumulative amount of diclofenac sodium penetrated through the MCE membrane plotted against square root of time [ $\text{min}^{0.5}$ ]. Instrument: USP Apparatus IV with semisolid adapter. Receptor media: pH 7.4 and 7.9. Flow rate 2 and 4 mL/min Product: Hydrogel 1 % and 2 %. The data represent the mean  $\pm$  standard error of the mean for six replicates.

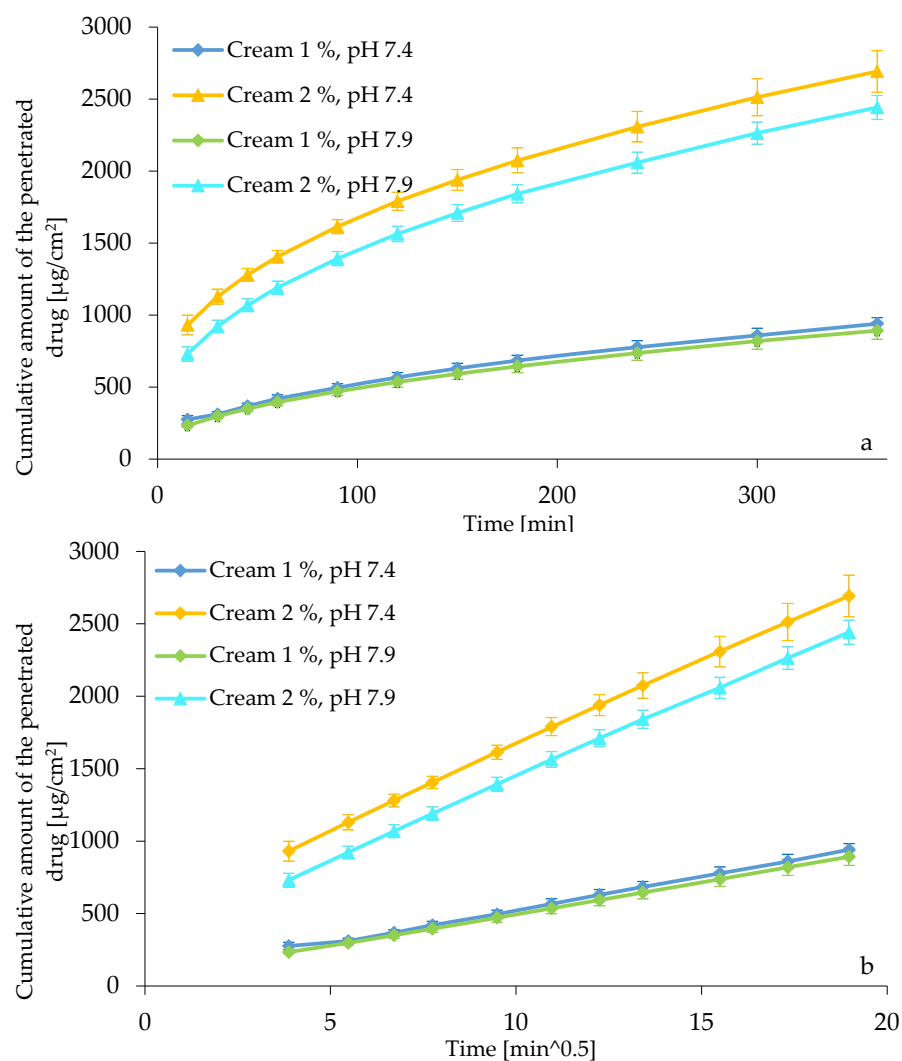

**Figure S5.** (a) Cumulative amount of diclofenac sodium penetrated through the MCE membrane plotted against time [min], (b) cumulative amount of diclofenac sodium penetrated through the MCE membrane plotted against square root of time [ $\text{min}^{0.5}$ ]. Instrument: USP Apparatus II with immersion cell. Receptor media: pH 7.4 and 7.9. Product: Cream 1 % and 2 %. The data represent the mean  $\pm$  standard error of the mean for six replicates.

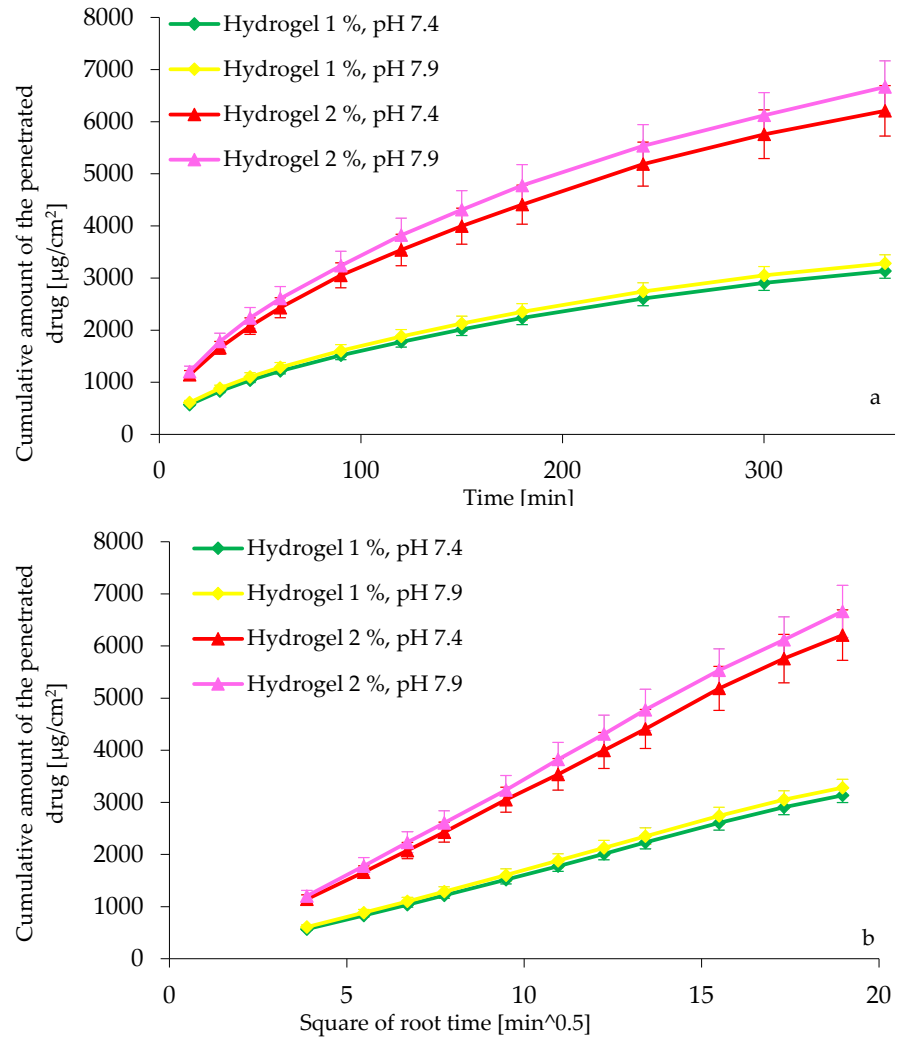

**Figure S6.** (a) Cumulative amount of diclofenac sodium penetrated through the MCE membrane plotted against time [min], (b) cumulative amount of diclofenac sodium penetrated through the MCE membrane plotted against square root of time [ $\text{min}^{0.5}$ ]. Instrument: USP Apparatus II with immersion cell. Receptor media: pH 7.4 and pH 7.9. Product: Cream 1 % and 2 %. The data represent the mean  $\pm$  standard error of the mean for six replicates.

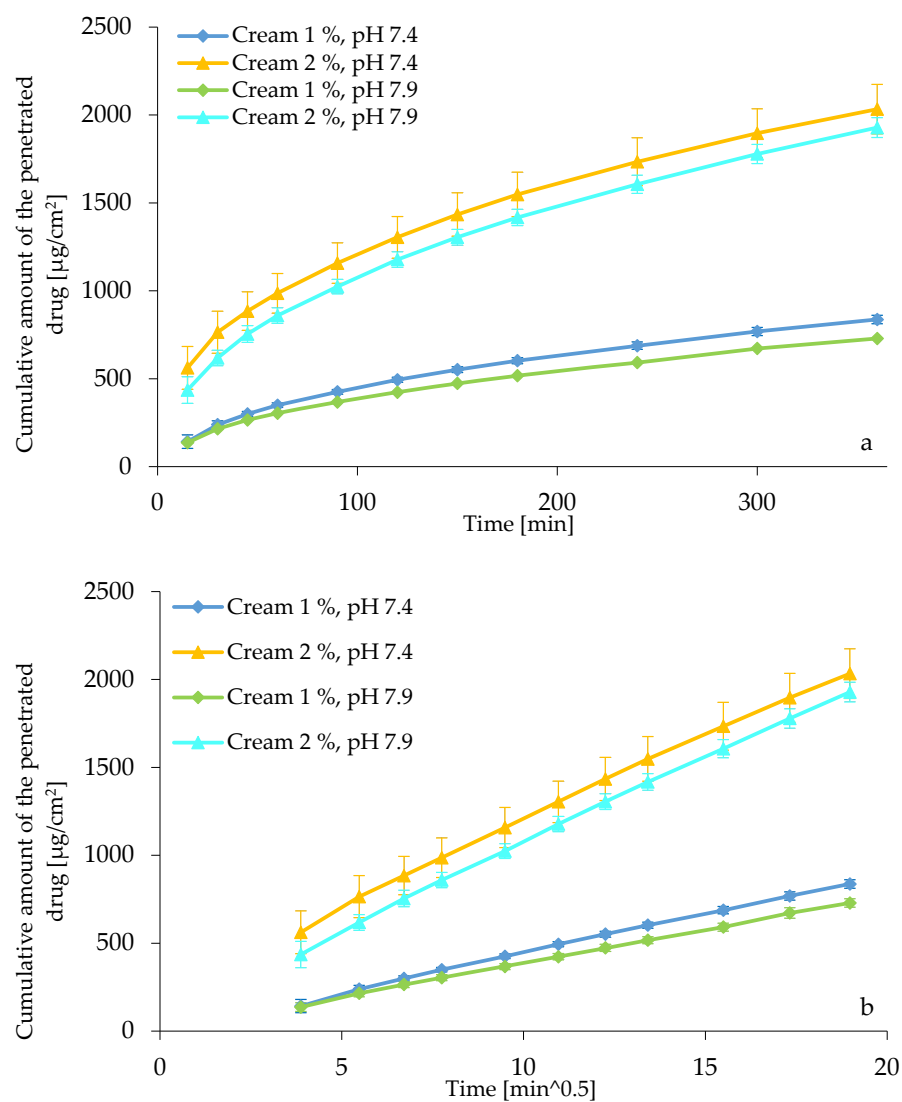

**Figure S7.** (a) Cumulative amount of diclofenac sodium penetrated through the MCE membrane plotted against time [min], (b) cumulative amount of diclofenac sodium penetrated through the MCE membrane plotted against square root of time [ $\text{min}^{0.5}$ ]. Instrument: Static Vertical diffusion cell (Franz cell). Receptor media: pH 7.4 and 7.9. Product: Cream 1 % and 2 %. The data represent the mean  $\pm$  standard error of the mean for six replicates.

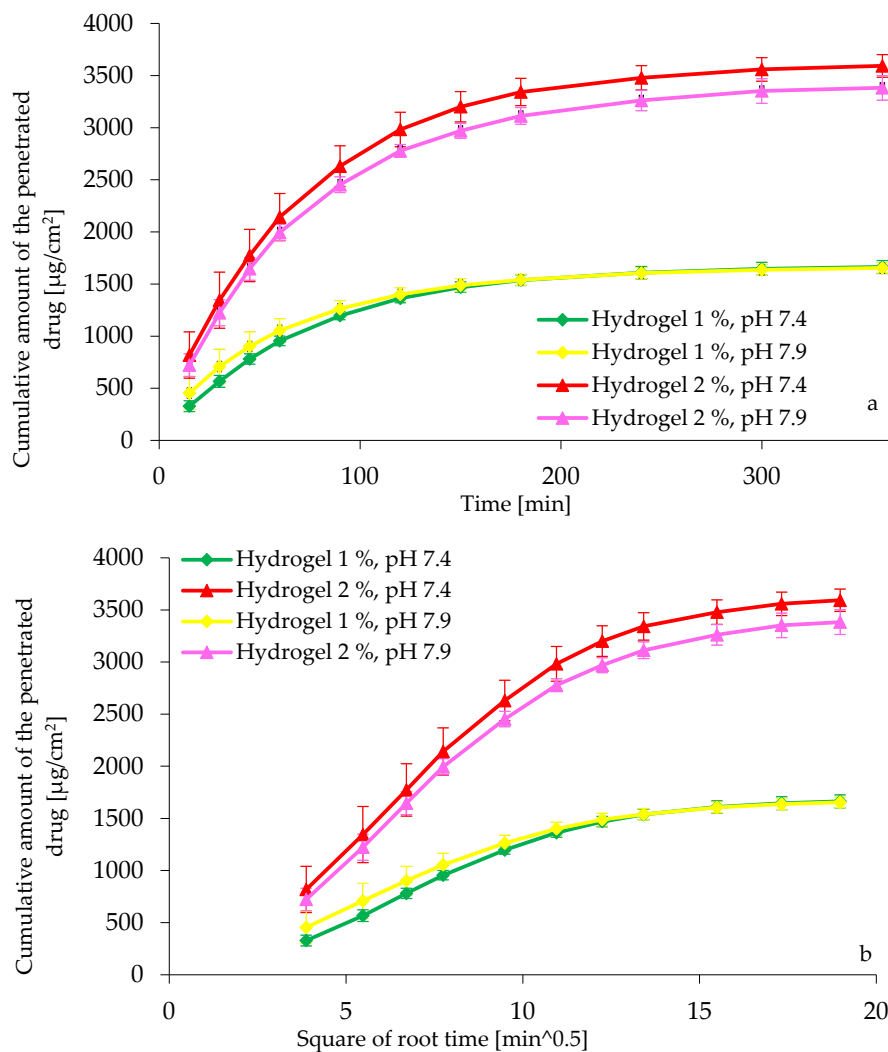

**Figure S8.** (a) Cumulative amount of diclofenac sodium penetrated through the MCE membrane plotted against time [min], (b) cumulative amount of diclofenac sodium penetrated through the MCE membrane plotted against square root of time [ $\text{min}^{0.5}$ ]. Instrument: Static Vertical diffusion cell (Franz cell). Receptor media: pH 7.4 and 7.9. Product: Hydrogel 1 % and 2 %. The data represent the mean  $\pm$  standard error of the mean for six replicates.



**Table S1.** *In vitro* release rates and fluxes of diclofenac sodium from cream 1% and 2 % at 6 hours measured with different methods with pH 7.4 medium.

| Apparatus                                  | Franz cell | Franz cell | USP IV with SSA | USP II with immersion cell | USP II with immersion cell | FTDC     | FTDC     | FTDC     | FTDC     |         |
|--------------------------------------------|------------|------------|-----------------|-----------------|-----------------|-----------------|----------------------------|----------------------------|----------|----------|----------|----------|---------|
| API%                                       | 1%         | 2 %        | 1%              | 1%              | 2 %             | 2 %             | 1%                         | 2%                         | 1%       | 1%       | 2%       | 2%       |         |
| pH                                         | pH 7.4     | pH 7.4     | pH 7.4          | pH 7.4          | pH 7.4          | pH 7.4          | pH 7.4                     | pH 7.4                     | pH 7.4   | pH 7.4   | pH 7.4   | pH 7.4   |         |
| Flow rate (mL/min) or stirring speed (rpm) | 400 rpm    | 400 rpm    | 2 mL/min        | 4 mL/min        | 2 mL/min        | 4 mL/min        | 250 rpm                    | 250 rpm                    | 2 mL/min | 4 mL/min | 2 mL/min | 4 mL/min |         |
| IVRR at 6 h (%)                            | 1          | 50.10      | 64.25           | 28.84           | 29.51           | 22.70           | 25.20                      | 24.20                      | 34.99    | 25.97    | 53.85    | 30.00    | 50.39   |
|                                            | 2          | 50.65      | 62.89           | 28.58           | 31.42           | 23.74           | 26.47                      | 26.67                      | 36.08    | 36.52    | 69.86    | 28.06    | 37.25   |
|                                            | 3          | 49.34      | -               | 28.38           | 29.35           | 25.31           | 25.66                      | 28.16                      | 39.98    | 33.82    | 57.92    | 34.47    | 39.66   |
|                                            | 4          | 50.27      | 58.35           | 28.18           | 30.09           | 23.28           | 25.52                      | 25.63                      | 35.25    | 27.06    | 55.74    | 45.42    | 40.14   |
|                                            | 5          | 48.44      | 61.87           | 27.31           | 29.59           | 23.28           | 25.08                      | 25.50                      | 40.95    | 29.01    | 45.85    | 47.51    | 47.37   |
|                                            | 6          | 46.93      | 59.18           | 27.26           | 30.19           | 22.68           | 25.77                      | 26.39                      | 40.75    | -        | -        | -        | -       |
|                                            | Mean       | 49.29      | 61.31           | 28.09           | 30.02           | 23.50           | 25.62                      | 26.09                      | 38.00    | 30.47    | 56.64    | 37.09    | 42.96   |
|                                            | SD         | 1.40       | 2.49            | 0.66            | 0.76            | 0.97            | 0.49                       | 1.33                       | 2.85     | 4.52     | 8.68     | 8.90     | 5.62    |
|                                            | RSD%       | 2.83       | 4.06            | 2.36            | 2.53            | 4.13            | 1.93                       | 5.09                       | 7.49     | 14.85    | 15.33    | 23.99    | 13.07   |
| IVRR at 6 h (µg/cm²)                       | 1          | 850.61     | 2181.78         | 905.54          | 944.80          | 1457.71         | 1631.09                    | 916.09                     | 2648.80  | 455.91   | 920.97   | 1046.68  | 1757.76 |
|                                            | 2          | 859.89     | 2135.51         | 887.18          | 997.36          | 1523.73         | 1687.24                    | 979.28                     | 2649.58  | 643.21   | 1214.66  | 956.54   | 1269.78 |
|                                            | 3          | 837.65     | -               | 886.66          | 935.86          | 1611.07         | 1630.39                    | 1002.24                    | 2710.22  | 578.47   | 1016.90  | 1186.74  | 1365.42 |
|                                            | 4          | 853.43     | 1981.30         | 889.19          | 959.57          | 1478.30         | 1610.62                    | 912.16                     | 2469.22  | 475.04   | 965.86   | 1548.41  | 1368.24 |
|                                            | 5          | 822.38     | 2100.88         | 854.65          | 934.44          | 1487.63         | 1601.17                    | 893.39                     | 2776.14  | 501.02   | 781.50   | 1635.78  | 1631.15 |
|                                            | 6          | 796.77     | 2009.37         | 847.09          | 952.19          | 1459.30         | 1610.59                    | 939.28                     | 2900.57  | -        | -        | -        | -       |
|                                            | Mean       | 836.79     | 2081.77         | 878.38          | 954.04          | 1502.96         | 1628.51                    | 940.41                     | 2692.42  | 530.73   | 979.98   | 1274.83  | 1478.47 |
|                                            | SD         | 23.71      | 84.54           | 22.55           | 23.28           | 58.17           | 31.14                      | 42.27                      | 144.37   | 78.28    | 157.73   | 302.60   | 206.03  |

| Apparatus                                        | Franz cell | Franz cell | USP IV with SSA | USP II with immersion cell | USP II with immersion cell | FTDC     | FTDC     | FTDC     | FTDC     |        |
|--------------------------------------------------|------------|------------|-----------------|-----------------|-----------------|-----------------|----------------------------|----------------------------|----------|----------|----------|----------|--------|
| API%                                             | 1%         | 2 %        | 1%              | 1%              | 2 %             | 2 %             | 1%                         | 2%                         | 1%       | 1%       | 2%       | 2%       |        |
| pH                                               | pH 7.4     | pH 7.4     | pH 7.4          | pH 7.4          | pH 7.4          | pH 7.4          | pH 7.4                     | pH 7.4                     | pH 7.4   | pH 7.4   | pH 7.4   | pH 7.4   |        |
| Flow rate (mL/min) or stirring speed (rpm)       | 400 rpm    | 400 rpm    | 2 mL/min        | 4 mL/min        | 2 mL/min        | 4 mL/min        | 250 rpm                    | 250 rpm                    | 2 mL/min | 4 mL/min | 2 mL/min | 4 mL/min |        |
| RSD%                                             | 2.83       | 4.06       | 2.57            | 2.44            | 3.87            | 1.91            | 4.50                       | 5.36                       | 14.75    | 16.10    | 23.74    | 13.94    |        |
| Flux (µg*cm <sup>-2</sup> *min <sup>-0.5</sup> ) | 1          | 43.33      | 92.28           | 48.02           | 46.79           | 83.14           | 84.37                      | 45.04                      | 105.14   | 24.92    | 47.85    | 53.91    | 105.40 |
|                                                  | 2          | 45.41      | 97.10           | 48.08           | 52.94           | 86.01           | 88.01                      | 48.05                      | 112.24   | 26.48    | 61.32    | 54.72    | 67.13  |
|                                                  | 3          | 45.05      | -               | 46.74           | 49.69           | 91.84           | 85.10                      | 49.19                      | 117.60   | 27.28    | 49.69    | 63.56    | 80.59  |
|                                                  | 4          | 45.76      | 101.63          | 46.28           | 50.25           | 82.06           | 84.39                      | 44.03                      | 98.59    | 24.74    | 54.27    | 85.05    | 93.87  |
|                                                  | 5          | 45.06      | 102.00          | 45.44           | 49.28           | 83.35           | 83.47                      | 44.71                      | 124.05   | 24.90    | 41.79    | 94.59    | 96.00  |
|                                                  | 6          | 40.20      | 94.22           | 45.19           | 50.41           | 83.35           | 85.19                      | 47.14                      | 129.50   | -        | -        | -        | -      |
|                                                  | Mean       | 44.13      | 97.45           | 46.63           | 49.89           | 84.96           | 85.09                      | 46.36                      | 114.52   | 25.67    | 50.98    | 70.37    | 88.60  |
|                                                  | SD         | 2.10       | 4.34            | 1.24            | 1.99            | 3.61            | 1.56                       | 2.07                       | 11.59    | 1.15     | 7.31     | 18.47    | 14.92  |
| RSD%                                             | 4.76       | 4.46       | 2.66            | 3.98            | 4.25            | 1.83            | 4.46                       | 10.12                      | 4.47     | 14.33    | 26.25    | 16.84    |        |

**Table S2.** *In vitro* release rates and fluxes of diclofenac sodium from hydrogel 1% and 2 % at 6 hours measured with different methods with pH 7.4 medium.

| Apparatus                                  | Franz cell | Franz cell | USP IV with SSA | USP II with immersion cell | USP II with immersion cell | FTDC     | FTDC     | FTDC     | FTDC     |         |
|--------------------------------------------|------------|------------|-----------------|-----------------|-----------------|-----------------|----------------------------|----------------------------|----------|----------|----------|----------|---------|
| API%                                       | 1%         | 2 %        | 1%              | 1%              | 2 %             | 2 %             | 1%                         | 2%                         | 1%       | 1%       | 2%       | 2%       |         |
| pH                                         | pH 7.4     | pH 7.4     | pH 7.4          | pH 7.4          | pH 7.4          | pH 7.4          | pH 7.4                     | pH 7.4                     | pH 7.4   | pH 7.4   | pH 7.4   | pH 7.4   |         |
| Flow rate (mL/min) or stirring speed (rpm) | 400 rpm    | 400 rpm    | 2 mL/min        | 4 mL/min        | 2 mL/min        | 4 mL/min        | 250 rpm                    | 250 rpm                    | 2 mL/min | 4 mL/min | 2 mL/min | 4 mL/min |         |
| IVRR at 6 h (%)                            | 1          | 92.75      | 89.11           | 98.70           | 93.17           | 98.30           | 99.84                      | 80.70                      | 97.85    | 96.02    | 101.93   | 82.13    | 97.89   |
|                                            | 2          | 95.52      | 86.99           | 98.58           | 96.44           | 99.78           | 100.70                     | 87.62                      | 82.15    | 91.52    | 98.00    | 81.49    | 98.04   |
|                                            | 3          | 94.49      | 92.76           | 100.65          | 94.35           | 98.56           | 101.15                     | 87.85                      | 81.58    | 92.82    | 113.34   | 84.26    | 99.38   |
|                                            | 4          | 95.99      | 93.42           | 103.50          | 93.92           | 99.09           | 100.90                     | 88.31                      | 94.34    | 91.19    | 101.21   | 81.55    | 97.41   |
|                                            | 5          | 91.02      | 90.20           | 100.83          | 94.30           | 99.10           | 101.45                     | 87.86                      | 78.49    | 92.79    | 108.59   | 99.05    | 100.95  |
|                                            | 6          | 84.59      | 97.94           | 91.47           | 93.17           | 97.08           | 99.38                      | 86.49                      | 86.76    | -        | -        | -        | -       |
|                                            | Mean       | 92.39      | 91.74           | 98.95           | 94.23           | 98.65           | 100.57                     | 86.47                      | 86.86    | 92.87    | 104.61   | 85.70    | 98.74   |
|                                            | SD         | 4.24       | 3.85            | 4.08            | 1.20            | 0.93            | 0.80                       | 2.89                       | 7.71     | 1.91     | 6.21     | 7.55     | 1.44    |
|                                            | RSD%       | 4.59       | 4.20            | 4.12            | 1.28            | 0.94            | 0.80                       | 3.35                       | 8.87     | 2.06     | 5.94     | 8.81     | 1.45    |
| IVRR at 6 h (µg/cm²)                       | 1          | 1627.20    | 3631.14         | 3086.13         | 2992.63         | 6347.96         | 6429.02                    | 2872.26                    | 6634.17  | 1658.57  | 1783.7   | 2800.04  | 3303.95 |
|                                            | 2          | 1675.75    | 3741.59         | 3087.21         | 3114.36         | 6461.93         | 6449.25                    | 3267.01                    | 5940.61  | 1612.07  | 1703.8   | 2778.15  | 3475.94 |
|                                            | 3          | 1764.70    | 3674.72         | 3209.02         | 3020.51         | 6334.09         | 6555.98                    | 3226.02                    | 5715.14  | 1603.29  | 1983.4   | 2872.41  | 3455.76 |
|                                            | 4          | 1684.05    | 3489.22         | 3212.61         | 3046.20         | 6332.82         | 6438.57                    | 3143.37                    | 6715.88  | 1580.26  | 1759.6   | 2872.64  | 3387.31 |
|                                            | 5          | 1648.33    | 3471.07         | 3227.52         | 3022.51         | 6362.45         | 6544.63                    | 3176.94                    | 5676.07  | 1576.45  | 1912.6   | 3511.86  | 3464.32 |
|                                            | 6          | 1579.71    | 3547.28         | 2924.78         | 3013.63         | 6257.43         | 6445.74                    | 3127.50                    | 6568.11  | -        | -        | -        | -       |
|                                            | Mean       | 1663.29    | 3592.50         | 3124.55         | 3034.97         | 6349.44         | 6477.20                    | 3135.51                    | 6208.33  | 1606.13  | 1828.62  | 2967.02  | 3417.46 |
|                                            | SD         | 62.26      | 107.65          | 116.85          | 42.52           | 66.03           | 57.16                      | 139.02                     | 483.03   | 32.95    | 115.51   | 307.51   | 72.24   |
|                                            | RSD%       | 3.74       | 3.00            | 3.74            | 1.40            | 1.04            | 0.88                       | 4.43                       | 7.78     | 2.05     | 6.32     | 10.36    | 2.11    |

| Apparatus                                  | Franz cell | Franz cell | USP IV with SSA | USP II with immersion cell | USP II with immersion cell | FTDC     | FTDC     | FTDC     | FTDC     |        |
|--------------------------------------------|------------|------------|-----------------|-----------------|-----------------|-----------------|----------------------------|----------------------------|----------|----------|----------|----------|--------|
| API%                                       | 1%         | 2 %        | 1%              | 1%              | 2 %             | 2 %             | 1%                         | 2%                         | 1%       | 1%       | 2%       | 2%       |        |
| pH                                         | pH 7.4     | pH 7.4     | pH 7.4          | pH 7.4          | pH 7.4          | pH 7.4          | pH 7.4                     | pH 7.4                     | pH 7.4   | pH 7.4   | pH 7.4   | pH 7.4   |        |
| Flow rate (mL/min) or stirring speed (rpm) | 400 rpm    | 400 rpm    | 2 mL/min        | 4 mL/min        | 2 mL/min        | 4 mL/min        | 250 rpm                    | 250 rpm                    | 2 mL/min | 4 mL/min | 2 mL/min | 4 mL/min |        |
| Flux (µg*cm-2*min-0,5)                     | 1          | 156.14     | 326.88          | 264.12          | 286.09          | 540.86          | 618.28                     | 153.61                     | 375.11   | 174.02   | 164.71   | 317.42   | 405.64 |
|                                            | 2          | 164.59     | 348.80          | 267.91          | 280.99          | 563.08          | 659.90                     | 185.65                     | 337.47   | 173.66   | 178.81   | 301.12   | 538.02 |
|                                            | 3          | 170.02     | 344.78          | 273.39          | 291.83          | 573.73          | 624.32                     | 186.11                     | 309.90   | 176.40   | 195.66   | 311.87   | 410.90 |
|                                            | 4          | 167.71     | 337.83          | 272.33          | 342.25          | 627.29          | 613.69                     | 180.09                     | 372.07   | 169.56   | 199.47   | 313.78   | 407.95 |
|                                            | 5          | 169.33     | 341.06          | 265.71          | 292.97          | 574.12          | 627.30                     | 182.44                     | 301.71   | 171.10   | 184.32   | 424.62   | 431.16 |
|                                            | 6          | 146.99     | 350.09          | 265.23          | 288.41          | 543.94          | 614.00                     | 178.41                     | 381.09   | -        | -        | -        | -      |
|                                            | Mean       | 162.46     | 341.57          | 268.11          | 297.09          | 570.50          | 626.25                     | 177.72                     | 346.22   | 172.95   | 184.59   | 333.76   | 438.73 |
|                                            | SD         | 9.12       | 8.55            | 3.89            | 22.54           | 31.26           | 17.37                      | 12.19                      | 34.92    | 2.67     | 13.90    | 51.15    | 56.42  |
|                                            | RSD%       | 5.61       | 2.50            | 1.45            | 7.59            | 5.48            | 2.77                       | 6.86                       | 10.08    | 1.54     | 7.52     | 15.33    | 12.60  |

**Table S3.** Results of accuracy measurement at a nominal concentration of 100% using cream matrix.

| Name of the apparatus     | Accuracy<br>% | Mean of accuracy<br>% | SD of accuracy<br>% | RSD of accuracy<br>% |
|---------------------------|---------------|-----------------------|---------------------|----------------------|
| Franz cell                | 96.64         | 96.58                 | 0.23                | 0.23                 |
|                           | 96.88         |                       |                     |                      |
|                           | 96.48         |                       |                     |                      |
|                           | 96.45         |                       |                     |                      |
|                           | 96.77         |                       |                     |                      |
|                           | 96.26         |                       |                     |                      |
|                           | 96.26         |                       |                     |                      |
| USP II,<br>immersion cell | 101.60        | 100.94                | 1.18                | 1.17                 |
|                           | 101.13        |                       |                     |                      |
|                           | 100.94        |                       |                     |                      |
|                           | 101.62        |                       |                     |                      |
|                           | 101.74        |                       |                     |                      |
|                           | 98.62         |                       |                     |                      |
|                           | 98.62         |                       |                     |                      |
| USP IV, SSA               | 99.11         | 99.04                 | 0.17                | 0.17                 |
|                           | 99.18         |                       |                     |                      |
|                           | 98.96         |                       |                     |                      |
|                           | 99.17         |                       |                     |                      |
|                           | 99.09         |                       |                     |                      |
|                           | 98.74         |                       |                     |                      |
|                           | 98.74         |                       |                     |                      |

**Table S4.** Results of accuracy measurement at a nominal concentration of 100% using hydrogel matrix.

| Name of the apparatus     | Accuracy<br>% | Mean of accuracy<br>% | SD of accuracy<br>% | RSD of accuracy<br>% |
|---------------------------|---------------|-----------------------|---------------------|----------------------|
| Franz cell                | 94.51         | 94.64                 | 0.75                | 0.79                 |
|                           | 93.78         |                       |                     |                      |
|                           | 95.98         |                       |                     |                      |
|                           | 94.72         |                       |                     |                      |
|                           | 94.15         |                       |                     |                      |
|                           | 94.70         |                       |                     |                      |
| USP II,<br>immersion cell | 103.53        | 102.00                | 1.35                | 1.32                 |
|                           | 101.49        |                       |                     |                      |
|                           | 100.98        |                       |                     |                      |
| USP IV, SSA               | 96.91         | 97.08                 | 0.17                | 0.18                 |
|                           | 96.83         |                       |                     |                      |
|                           | 97.26         |                       |                     |                      |
|                           | 97.21         |                       |                     |                      |
|                           | 97.15         |                       |                     |                      |
|                           | 97.14         |                       |                     |                      |

**Table 5.** IVRR and fluxes of diclofenac sodium from 1% and 2 % cream measured for 6 hours using different methods with pH 7.9 medium.

| Apparatus                                        | Franz cell | Franz cell | USP IV<br>with SSA | USP IV<br>with SSA | USP II<br>with<br>immersion<br>cell | USP II<br>with<br>immersion<br>cell |         |
|--------------------------------------------------|------------|------------|--------------------|--------------------|-------------------------------------|-------------------------------------|---------|
| API (%)                                          | 1%         | 2 %        | 1%                 | 2 %                | 1%                                  | 2%                                  |         |
| pH                                               | pH 7.9     | pH 7.9     | pH 7.9             | pH 7.9             | pH 7.9                              | pH 7.9                              |         |
| Flow rate (mL/min) or<br>stirring speed (rpm)    | 400 rpm    | 400 rpm    | 4 ml/min           | 4 ml/min           | 250 rpm                             | 250 rpm                             |         |
| IVRR at 6 h (%)                                  | 1          | 45.09      | 57.91              | 24.43              | 26.14                               | 24.45                               | 34.37   |
|                                                  | 2          | 48.07      | 55.87              | 27.40              | 28.76                               | 24.71                               | 34.85   |
|                                                  | 3          | 44.43      | 55.94              | 27.03              | 28.82                               | 25.57                               | 37.48   |
|                                                  | 4          | 45.86      | 54.45              | 26.38              | 27.85                               | 23.33                               | 33.90   |
|                                                  | 5          | 39.56      | 59.04              | 26.69              | 28.17                               | 26.58                               | 36.27   |
|                                                  | 6          | 37.92      | 57.51              | 25.98              | 28.30                               | 25.72                               | 36.44   |
|                                                  | Mean       | 43.49      | 56.79              | 26.32              | 28.01                               | 25.06                               | 35.55   |
|                                                  | SD         | 3.91       | 1.66               | 1.05               | 0.98                                | 1.14                                | 1.39    |
|                                                  | RSD%       | 9.00       | 2.93               | 3.99               | 3.52                                | 4.54                                | 3.91    |
| IVRR at 6 h<br>(µg/cm²)                          | 1          | 765.47     | 1966.24            | 767.19             | 1676.51                             | 856.58                              | 2407.59 |
|                                                  | 2          | 734.49     | 1897.21            | 841.68             | 1847.06                             | 865.69                              | 2520.54 |
|                                                  | 3          | 704.09     | 1899.64            | 828.30             | 1862.71                             | 866.70                              | 2498.86 |
|                                                  | 4          | 700.79     | 1848.91            | 815.16             | 1783.82                             | 830.47                              | 2298.52 |
|                                                  | 5          | 738.79     | 2004.79            | 822.01             | 1755.37                             | 976.26                              | 2500.31 |
|                                                  | 6          | 729.61     | 1952.70            | 801.38             | 1767.55                             | 958.92                              | 2429.40 |
|                                                  | Mean       | 728.88     | 1928.25            | 812.62             | 1782.17                             | 892.44                              | 2442.54 |
|                                                  | SD         | 23.97      | 56.53              | 25.98              | 67.52                               | 59.92                               | 83.34   |
|                                                  | RSD%       | 3.29       | 2.93               | 3.20               | 3.79                                | 6.71                                | 3.41    |
| Flux (µg*cm <sup>-2</sup> *min <sup>-0.5</sup> ) | 1          | 38.69      | 97.22              | 38.77              | 87.85                               | 41.96                               | 104.79  |
|                                                  | 2          | 37.27      | 89.35              | 43.28              | 95.47                               | 43.60                               | 116.65  |
|                                                  | 3          | 35.75      | 95.90              | 43.17              | 98.60                               | 42.84                               | 114.82  |
|                                                  | 4          | 37.70      | 95.20              | 42.26              | 92.89                               | 41.13                               | 104.54  |
|                                                  | 5          | 39.67      | 101.98             | 43.13              | 92.81                               | 48.89                               | 111.86  |
|                                                  | 6          | 39.05      | 101.02             | 41.04              | 93.00                               | 47.87                               | 114.26  |
|                                                  | Mean       | 38.02      | 96.78              | 41.94              | 93.44                               | 44.38                               | 111.15  |
|                                                  | SD         | 1.42       | 4.55               | 1.77               | 3.55                                | 3.22                                | 5.25    |
|                                                  | RSD%       | 3.73       | 4.70               | 4.23               | 3.79                                | 7.26                                | 4.73    |

**Table S6.** IVRR and fluxes of diclofenac sodium from 1% and 2 % hydrogel measured for 6 hours using different methods with pH 7.9 medium.

| Apparatus                                        | Franz cell | Franz cell | USP IV<br>with SSA | USP IV<br>with SSA | USP II<br>with<br>immersion<br>cell | USP II<br>with<br>immersion<br>cell |         |
|--------------------------------------------------|------------|------------|--------------------|--------------------|-------------------------------------|-------------------------------------|---------|
| API (%)                                          | 1%         | 2 %        | 1%                 | 2 %                | 1%                                  | 2%                                  |         |
| pH                                               | pH 7.9     | pH 7.9     | pH 7.9             | pH 7.9             | pH 7.9                              | pH 7.9                              |         |
| Flow rate (mL/min) or<br>stirring speed (rpm)    | 400 rpm    | 400 rpm    | 4 mL/min           | 4 mL/min           | 250 rpm                             | 250 rpm                             |         |
| IVRR at 6 h<br>(%)                               | 1          | 95.06      | 98.12              | 99.33              | 99.09                               | 89.10                               | 90.91   |
|                                                  | 2          | 94.98      | 96.55              | 98.64              | 101.27                              | 90.39                               | 90.93   |
|                                                  | 3          | 102.75     | 98.42              | 99.98              | 100.09                              | 88.26                               | 86.81   |
|                                                  | 4          | 94.34      | 99.59              | 91.67              | 98.62                               | 87.54                               | 86.74   |
|                                                  | 5          | 94.75      | 101.82             | 100.87             | 99.56                               | 86.44                               | 87.37   |
|                                                  | 6          | 99.78      | 99.85              | 98.33              | 98.14                               | 86.09                               | 89.14   |
|                                                  | Mean       | 96.94      | 99.06              | 98.14              | 99.46                               | 87.97                               | 88.65   |
|                                                  | SD         | 3.48       | 1.80               | 3.30               | 1.12                                | 1.63                                | 1.96    |
|                                                  | RSD%       | 3.59       | 1.81               | 3.36               | 1.13                                | 1.85                                | 2.21    |
| IVRR at 6 h<br>(µg/cm²)                          | 1          | 1613.93    | 3331.71            | 3067.01            | 6429.19                             | 3523.89                             | 6676.81 |
|                                                  | 2          | 1666.24    | 3278.47            | 3026.14            | 6524.75                             | 3421.65                             | 7294.96 |
|                                                  | 3          | 1744.46    | 3230.43            | 3120.83            | 6447.63                             | 3191.40                             | 6179.97 |
|                                                  | 4          | 1601.69    | 3494.31            | 3086.53            | 6320.37                             | 3264.14                             | 6272.47 |
|                                                  | 5          | 1662.34    | 3457.41            | 3064.98            | 6363.96                             | 3076.84                             | 6318.42 |
|                                                  | 6          | 1637.52    | 3503.58            | 3001.20            | 6266.47                             | 3209.96                             | 7252.47 |
|                                                  | Mean       | 1654.36    | 3382.65            | 3061.12            | 6392.06                             | 3281.31                             | 6665.85 |
|                                                  | SD         | 51.02      | 117.73             | 42.60              | 93.57                               | 163.59                              | 500.31  |
|                                                  | RSD%       | 3.08       | 3.48               | 1.39               | 1.46                                | 4.99                                | 7.51    |
| Flux (µg*cm <sup>-2</sup> *min <sup>-0.5</sup> ) | 1          | 134.41     | 320.16             | 284.95             | 583.77                              | 201.41                              | 382.52  |
|                                                  | 2          | 138.16     | 323.03             | 280.74             | 529.59                              | 195.21                              | 413.38  |
|                                                  | 3          | 161.57     | 310.08             | 294.69             | 563.12                              | 182.16                              | 348.09  |
|                                                  | 4          | 162.30     | 340.68             | 268.55             | 594.92                              | 187.68                              | 358.06  |
|                                                  | 5          | 170.65     | 336.01             | 296.63             | 514.03                              | 171.08                              | 355.39  |
|                                                  | 6          | 165.64     | 346.28             | 291.72             | 615.60                              | 178.02                              | 403.65  |
|                                                  | Mean       | 155.46     | 329.37             | 286.21             | 566.84                              | 185.93                              | 376.85  |
|                                                  | SD         | 15.24      | 13.82              | 10.53              | 39.10                               | 11.19                               | 27.30   |
|                                                  | RSD%       | 9.80       | 4.20               | 3.68               | 6.90                                | 6.02                                | 7.24    |
